# Supplementary material
Source: Springer Nature journal article supplement (https://www.springermedizin.de/resource/supplementary/12916_2013_774_MOESM1_ESM.pdf/9598256)
Supplement: MOESM1 [file 9598256]

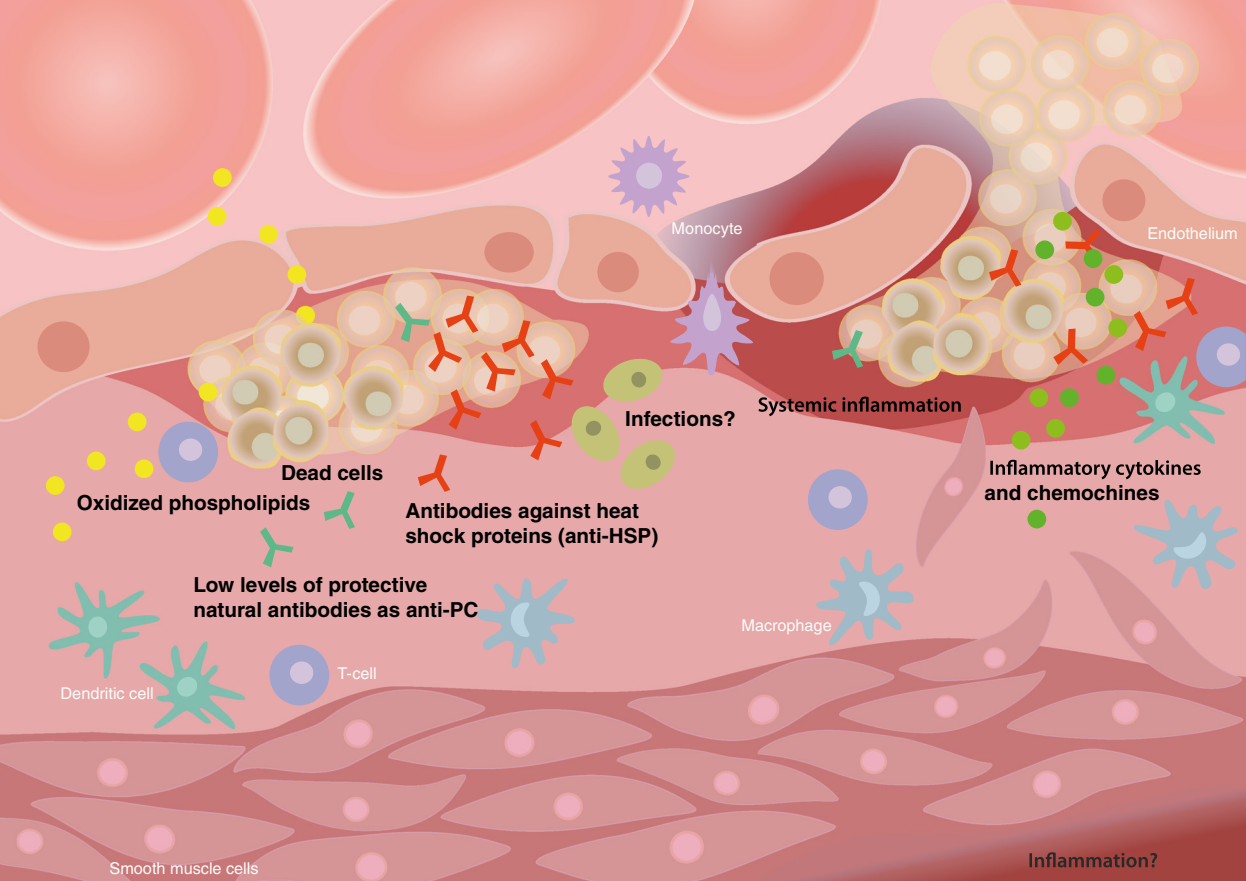

Monocyte

Endothelium

Systemic inflammation

Infections?

Inflammatory cytokines and chemokines

Dead cells

Oxidized phospholipids

Antibodies against heat shock proteins (anti-HSP)

Low levels of protective natural antibodies as anti-PC

Macrophage

T-cell

Dendritic cell

Smooth muscle cells

Inflammation?
